# Supplementary material for: A usability study of a serious game to teach emotion recognition to people with Autism Spectrum Disorder and intellectual disabilities
Source: Research Square preprint supplement (doi:10.21203/rs.3.rs-3617481/v1), 2023-11-20
Supplement: Supplementary file 1 [file 6e784bec16da75224eb7b77e.docx]

**Appendix**

1. **Observation Grid**

| **Preliminary information:** |  |
| --- | --- |
| Answer aid setting (circle one): | 10 s (fast) | 20 s (medium) | 30 s (slow) | disabled |
| Time of day (observation): |  |
| Specific situation (child is sick, tired, | |
| stressful event, etc.): |  |
|  |  |
| **Computer for observation** | **Rating** |
| **Navigation in the profile selection section (pro) I yes X no** | |
| Find the profile easily |  |
| Horizontal scrolling bug |  |
|  |  |
|  |  |
| **Use of the application's sections I each time they begin a section** | |
| ***Children*** |  |
| Games |  |
| Course |  |
| Exploration |  |
| ***Pros*** |  |
| Games |  |
| Course |  |
| Exploration |  |
| Settings and profiles (click on the button) | |
| Stats |  |
| Customization |  |
|  |  |
| **Navigation among the different sections of the application (child)** | |
| Backtracking when changing sections | |
| Quitting the section change in progress | |
| Quitting after a screen loading delay | |
|  |  |
|  |  |
|  |  |
| **First appearance of an instruction: use of the audio button? I yes X no** | |
| Children |  |
| Pros |  |
|  |  |
| **Correct answer after activation of answer aid I yes X no** | |
| Activation 1 |  |
| Activation 2 |  |
| Activation 3 |  |
| Activation 4 |  |
| Activation 5 |  |
|  |  |
|  |  |
| **Frustration** | **I yes X no** |
| After incorrect response 1 |  |
| After incorrect response 2 |  |
| After incorrect response 3 |  |
| After incorrect response 4 |  |
| After incorrect response 5 |  |
|  |  |
| After other events: |  |
|  |  |
|  |  |
|  |  |
|  |  |
|  |  |
| Sections of the application generating | |
| continuous frustration: |  |
|  |  |
|  |  |
| **Activities (Are they doing the same thing, make pairs, find the odd one out, look for the same, do the same)** | |
|  |  |
| Spontaneous request for an activity | |
| Explicit statement "I like it" etc. |  |
| Spontaneous request to stop an activity | |
| Explicit statement "I don't like it" etc. | |
|  |  |
| **Misuse of the app** |  |
| General observation of misuse (notes): | |
|  |  |
|  |  |
|  |  |
|  |  |
|  |  |
|  |  |
|  |  |
|  |  |
| **Need for guidance (general observation)** | Note for what (activity, action, etc.) |
| Low |  |
|  |  |
| Medium |  |
|  |  |
| High |  |
|  |  |
|  |  |
| **Behavior during the game** |  |
| Is the child blocked/"caught" by elements | |
| of the app? Which? |  |
| What are the child's main reactions | |
| to feedback in the app? (bubbles, | |
| monster and star at the end of the set, etc.) | |
| Does the child have "rituals" in the game | |
| (repetitive or stereotyped behaviors)? | |
| which? |  |
| Does the child get bored once he/she has | |
| understood how an exercise works? (explicit | |
| lack of interest for the task) |  |
|  |  |
| **"Active surface" of the tablet** |  |
| The child looks at the whole tablet screen | |
| The child only looks at certain parts; which? | |
|  |  |
|  |  |
|  |  |
|  |  |
| The child uses the whole screen |  |
| The child uses only certain parts of the screen; | |
| which? |  |
|  |  |

1. **Interview guide – ergonomic observations of the app’s usage – semi-directed interview T1**

**1) Have the professional being interviewed recall and explain their work**

- Could you describe a typical day/session/week?

**2) Identify use cases/scenarios for the app: what "typical scenario" has the professional set up when using the app with a child/children?**

- Could you describe how and why you have begun using the app in your sessions/at your work with the child? (reinforcement, seated work, games, etc.) (in order to work on what, which abilities, etc.)

- Describe what I must do to use the app during a session, imagining I am you, in as much detail as possible, step by step. With what do I begin? etc. Even the things that seem insignificant to you, tell me everything.

- Same thing for showing a child an app (this app?) for the first time: what should I do?

- How did you do it?

**3) “Difficult” situations**

- In general, which situations are difficult in your work?

- What are some difficult situations encountered while using the app?

- Regarding the child’s behavior: does he have behavioral difficulties? Which?

- Does he often show repetitive behaviors? Which?

- Does he often show stereotyped movements? Which?

- Does he often demonstrate stereotyped language? Like what?

- How does he show that he likes or doesn’t like something?

- How does he express his frustration, in general?

**4) Application engagement factors**

- Who would you say is best suited for using this app during sessions? Beginners, experienced users, or experts in your profession?

- What factors contribute to motivating professionals/you to use an app like this one, to learn to integrate it into a professional practice, to master its use?

- What would motivate you?

- What do you like doing best with this app/apps in general?

**5) Section reserved for specific questions about observations that need clarification**

No specific questions, questions to ask as needed

**6) In conclusion, to finish the interview:**

- What would you like to see in this app?

- What would you change if you could? And if there are things that you would like to improve, do you know how exactly?

III. **Interview Guide – Ergonomic observations of usage of the app – semi-directed interview T2**

**1) Questions about the professionals’ usual activity:**

- How do you work with children in general (table work, exercises, etc.; with what materials, how)?

-How do you usually work on emotions with children? (with what materials, how, how regularly...)

**2) Identify the usage context and the benefits of the various sections of the app**

- Usage context: for the different parts of the app, please tell me how you have used them: at the beginning of a session or at the end, as a reinforcer or not, etc.

-Course -Game -Exploration -Statistics -Customization-

- Benefits: for the different parts of the app, please tell me if possible what benefits each has brought you (better communication with the child, helping motivate the child, personal motivation, etc.)

Then: what benefits you think each has brought the child (entertainment, learning, etc.)

- Course: How have you used the course? Did you finish it?

If not, where did you stop (which level?)

- Statistics: Are any statistics missing? What data would you like to have?

**3) “Difficult” situations**

- What difficult situations did you encounter while using the app?

- Did the app cause any frustration?

**4) Application engagement factors**

Who would you say is best suited for using this app during sessions? Beginners, experienced users, or experts in your profession?

- What factors contribute to motivating you to use an app like this one, to learn to integrate it into a professional practice, to master its use?

- What would motivate you?

- What do you like doing best with this app?

**5) App content:**

- What do you think of the “pedagogical” content (the avatars, their emotions, the photos, the exercises, etc.)? Is this content appropriate? Is it lacking anything?

- What do you think of the way the application is used (the navigation among the different parts, the way the exercises are answered, things you can do, managing different profiles)? Is it appropriate?

- In your opinion, are there any features missing?

- What would you like to have in this app that is not already there?

- What would you change if you could? And if there are things you would like to improve, do you know exactly how?

- After the study, would you like to continue to use the app in your work?

- Would you recommend the app to other professionals who could find it useful?
